# Supplementary material
Source: publisher figshare collection journal article supplement (https://acs.figshare.com/ndownloader/files/14618273)
Supplement: Supplementary file 1 [file 14618273]

**Supporting Information:**

**Dynamic Adsorption of Ions into Like-Charged Nano-space: A Dynamic  
Density Functional Theory Study**

Leying Qing<sup>1</sup>, Yu Li<sup>1</sup>, Weiqiang Tang<sup>1</sup>, Duo Zhang<sup>2</sup>, Yongsheng Han<sup>3,4</sup>, and Shuangliang  
Zhao<sup>1,\*</sup>

*<sup>1</sup> State Key Laboratory of Chemical Engineering and School of Chemical Engineering, East  
China University of Science and Technology, 130 Meilong Road, Shanghai, 200237, China*

*<sup>2</sup> Ecole Nationale Supérieure des Ingénieurs en Arts Chimiques et Technologiques de  
Toulouse, 31030, France*

*<sup>3</sup> State Key Laboratory of Multiphase Complex Systems, Institute of Process Engineering,  
Chinese Academy of Sciences, 100190 Beijing, China*

*<sup>4</sup> School of Chemical Engineering, University of Chinese Academy of Sciences, 100049  
Beijing, China*

---

\*To whom correspondence should be addressed. Email: [szhao@ecust.edu.cn](mailto:szhao@ecust.edu.cn)

## Numerical Calculation Details of the DDFT Differential Equation

In this appendix, the numerical calculation details of the DDFT differential equations are provided.

### Local mean electrostatic potential

The local mean electrostatic potential can be obtained by solving the modified Poisson equation. In slab symmetry, the Poisson equation reads:

$$\frac{d}{dz} \left( \frac{d\psi(z,t)}{dz} \right) = -\frac{e}{\epsilon_0 \epsilon_r} \sum_i Z_i \rho_i(z,t). \quad (\text{A1})$$

where  $i$  refers to the ion species. Along the  $z$  direction, we integrate eq.(A1), yielding:

$$\begin{aligned} \int_0^z d \left( \frac{d\psi(z,t)}{dz} \right) &= -\frac{e}{\epsilon_0 \epsilon_r} \int_0^z \sum_i Z_i \rho_i(z,t) dz \\ \left( \frac{d\psi(z,t)}{dz} \right) \Big|_{z=z} - \left( \frac{d\psi(z,t)}{dz} \right) \Big|_{z=0} &= -\frac{e}{\epsilon_0 \epsilon_r} \int_0^z \sum_i Z_i \rho_i(z,t) dz \end{aligned} \quad (\text{A2})$$

We set  $-\frac{d\psi(z,t)}{dz} \Big|_{z=0} = C$ , and then eq.(A2) follows:

$$\left( \frac{d\psi(z,t)}{dz} \right) \Big|_{z=z} + C = -\frac{e}{\epsilon_0 \epsilon_r} \int_0^z \sum_i Z_i \rho_i(z,t) dz. \quad (\text{A3})$$

Further integration of eq.(A3) gives:

$$\begin{aligned} \int_0^z d\psi(z,t) + \int_0^z C dz &= -\frac{e}{\epsilon_0 \epsilon_r} \int_0^z \left[ \int_0^{z'} \sum_i Z_i \rho_i(z,t) dz \right] dz' \\ \psi(z,t) \Big|_{z=z} - \psi(z,t) \Big|_{z=0} + Cz &= -\frac{e}{\epsilon_0 \epsilon_r} \int_0^z \left[ \int_0^{z'} \sum_i Z_i \rho_i(z,t) dz \right] dz' \end{aligned} \quad (\text{A4})$$

By setting  $f(z',t) = \sum_i Z_i \rho_i(z,t)$ , eq.(A4) can be simplified as:

$$\psi(z,t) - \psi(0,t) + Cz = -\frac{e}{\epsilon_0 \epsilon_r} \int_0^z f(z',t) dz'. \quad (\text{A5})$$

With partial integration on the right part of eq.(A5), we have:

$$\begin{aligned}
-\frac{e}{\varepsilon_0 \varepsilon_r} \int_0^z f(z', t) dz' &= -\frac{e}{\varepsilon_0 \varepsilon_r} \left\{ f(z', t) z' \Big|_0^z - \int_0^z z' df(z', t) \right\} \\
&= -\frac{e}{\varepsilon_0 \varepsilon_r} \left\{ f(z, t) z - \int_0^z z' \sum_i Z_i \rho_i(z', t) dz' \right\} \\
&= -\frac{e}{\varepsilon_0 \varepsilon_r} \left\{ z \int_0^z \sum_i Z_i \rho_i(z, t) dz - \int_0^z z' \sum_i Z_i \rho_i(z', t) dz' \right\} \\
&= -\frac{e}{\varepsilon_0 \varepsilon_r} \int_0^z (z - z') \sum_i Z_i \rho_i(z', t) dz'
\end{aligned} \tag{A6}$$

The substitution of the above equation into eq.(A5) finally gives:

$$\psi(z, t) = \psi(0, t) - Cz - \frac{e}{\varepsilon_0 \varepsilon_r} \left\{ \int_0^z (z - z') \sum_i Z_i \rho_i(z', t) dz' \right\}, \tag{A7}$$

where the constant  $C$  can be obtained by combining with the boundary condition eq.(4):

$$CH = -\psi(H, t) + \psi(0, t) - \frac{e}{\varepsilon_0 \varepsilon_r} \left\{ \int_0^H (H - z') \sum_i Z_i \rho_i(z', t) dz' \right\}. \tag{A8}$$

### Algorithm and computational details for solving the DDFT differential equation

With the help of center difference method, the gradient of local chemical potential reads:

$$\mathbf{U}_i \left[ \left\{ \rho_i(z_j, t) \right\}, t \right] = \frac{\rho_i(z_{j+0.5}, t) \frac{\partial}{\partial z} [\mu_i(z_{j+0.5}, t)] - \rho_i(z_{j-0.5}, t) \frac{\partial}{\partial z} [\mu_i(z_{j-0.5}, t)]}{\Delta z}. \tag{A9}$$

A further application of center difference method on the gradient of chemical potential gives:

$$\mathbf{U}_i \left[ \left\{ \rho_i(z_j, t) \right\}, t \right] = \left\{ \frac{\rho_i(z_{j+1}, t) + \rho_i(z_j, t)}{2} \times \frac{\mu_i(z_{j+1}, t) - \mu_i(z_j, t)}{\Delta z} - \frac{\rho_i(z_j, t) + \rho_i(z_{j-1}, t)}{2} \times \frac{\mu_i(z_j, t) - \mu_i(z_{j-1}, t)}{\Delta z} \right\} / \Delta z. \tag{A10}$$

When  $j=1$  and  $j=H/\Delta z$ , the ionic density and chemical potential is given by the boundary equations (5)-(6)

With the help of  $\mathbf{U}_i \left[ \left\{ \rho_i(z_j, t) \right\}, t \right]$  determined above, equation (7) can be integrated

with Adams-Bashforth (AB) algorithm to give the new local density. Specifically, the

second-order AB algorithm and the fourth-order AB algorithm are combined in order to accelerate the numerical calculation process. For the first four time steps, the second-order AB algorithm is utilized, and thereafter the fourth-order AB algorithm is applied.

The second-order AB algorithm reads:

$$\rho_i(z, t_{k+1}) = \rho_i^*(z, t_k) + \frac{\Delta t}{2} \left[ 3\mathbf{U}_i \left[ \left\{ \rho_i^\alpha(z, t_k) \right\}, t_k \right] - \mathbf{U}_i \left[ \left\{ \rho_i(z, t_{k-1}) \right\}, t_{k-1} \right] \right], \quad (\text{A11})$$

and the fourth-order AB algorithm reads:

$$\rho_i(z, t_{k+1}) = \rho_i^*(z, t_k) + \frac{\Delta t}{24} \times \begin{bmatrix} 55 \\ -59 \\ 37 \\ -9 \end{bmatrix} \begin{bmatrix} \mathbf{U}_i \left[ \left\{ \rho_i^\alpha(z, t_k) \right\}, t_k \right] \\ \mathbf{U}_i \left[ \left\{ \rho_i^\alpha(z, t_{k-1}) \right\}, t_{k-1} \right] \\ \mathbf{U}_i \left[ \left\{ \rho_i^\alpha(z, t_{k-2}) \right\}, t_{k-2} \right] \\ \mathbf{U}_i \left[ \left\{ \rho_i^\alpha(z, t_{k-3}) \right\}, t_{k-3} \right] \end{bmatrix}. \quad (\text{A12})$$

The intermediate local density  $\rho_i^*(z, t_k)$  is determined by the Adams-Moulton (AM) algorithm. Similarly, the second-order AM algorithm and the fourth-order AM algorithm are combined. For the first four time steps, the second-order AM algorithm is utilized, and thereafter the fourth-order AM algorithm is applied.

The second-order AM algorithm reads:

$$\rho_i^*(z, t_{k+1}) = \rho_i^*(z, t_k) + \frac{\Delta t}{2} \left[ \mathbf{U}_i \left[ \left\{ \rho_i^\alpha(z, t_{k+1}) \right\}, t_{k+1} \right] + \mathbf{U}_i \left[ \left\{ \rho_i(z, t_k) \right\}, t_k \right] \right], \quad (\text{A13})$$

and the fourth-order AM algorithm reads:

$$\rho_i^*(z, t_{k+1}) = \rho_i^*(z, t_k) + \frac{\Delta t}{24} \times \begin{bmatrix} 9 \\ 19 \\ -5 \\ 1 \end{bmatrix} \begin{bmatrix} \mathbf{U}_i \left[ \left\{ \rho_i^\alpha(z, t_{k+1}) \right\}, t_{k+1} \right] \\ \mathbf{U}_i \left[ \left\{ \rho_i^\alpha(z, t_k) \right\}, t_k \right] \\ \mathbf{U}_i \left[ \left\{ \rho_i^\alpha(z, t_{k-1}) \right\}, t_{k-1} \right] \\ \mathbf{U}_i \left[ \left\{ \rho_i^\alpha(z, t_{k-2}) \right\}, t_{k-2} \right] \end{bmatrix}. \quad (\text{A14})$$

The gradient of chemical potential  $\mathbf{U}_i \left[ \left\{ \rho_i^\alpha(z, t_{k+1}) \right\}, t_{k+1} \right]$  is computed by using another intermediate local density  $\rho_i^\alpha(z, t_{k+1})$ , which is calculated by combining the prediction of

$\rho_i(z, t_{k+1})$  from the AB algorithm and  $\rho_i^*(z, t_{k+1})$  from the AM algorithm.

$$\begin{cases} \rho_i^\alpha(z, t_{k+1}) = \rho_i^*(z, t_{k+1}) \times \alpha + \rho_i(z, t_{k+1}) \times (1 - \alpha) , & \text{iter} = 1 \\ \rho_i^\alpha(z, t_{k+1}) = \rho_i^*(z, t_{k+1}) \times \alpha + \rho_i^\alpha(z, t_{k+1}) \times (1 - \alpha) , & \text{iter} > 1 \end{cases} . \quad (\text{A15})$$

Here  $\alpha$  is the relaxation factor, we take  $\alpha = 0.4$  during the calculation.
